# Supplementary material for: A Nucleotide Phosphatase Activity in the Nucleotide Binding Domain of an Orphan Resistance Protein from Rice
Source: PubMed Central journal article supplement — J Biol Chem. 2011 Dec 8;287(6):4023–32. doi: 10.1074/jbc.M111.314450 (PMC3281693; doi:10.1074/jbc.m111.314450), 2011-12-08

**Supplementary Figure 1.** Influence of reducing agents on R1-NB activity assayed by TLC. **A.** 10.0  $\mu\text{M}$  R1-NB was assayed in the presence of 1 mM ADP at increasing concentrations of dithiothreitol ( $n=3$ ). **B.** 10.0  $\mu\text{M}$  R1-NB was assayed in the presence of 1 mM ADP at increasing concentrations of monothioglycerol ( $n=4$ ). \*  $p < 0.05$ , \*\* not significant.

**A**

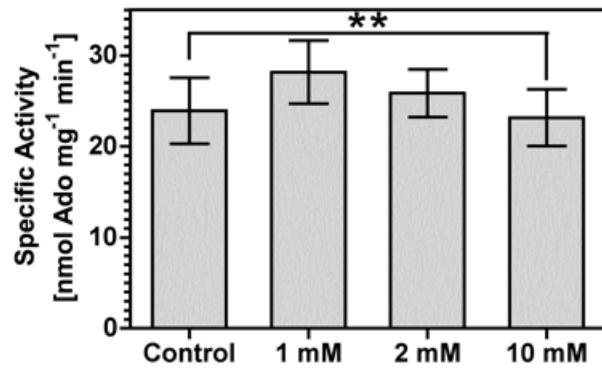

**B**

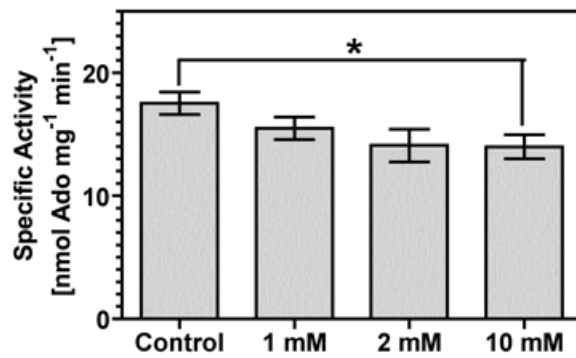

Supplement: supp_M111.314450_jbc.M111.314450-2.pdf [file supp_M111.314450_jbc.M111.314450-2.pdf]
